# Supplementary material for: NGAL is Downregulated in Oral Squamous Cell Carcinoma and Leads to Increased Survival, Proliferation, Migration, and Chemoresistance
Source: Preprints.org preprint supplement (doi:10.20944/preprints201805.0076.v1), 2018-05-03
Supplement: Supplementary file 2 [file supplementary]

Table 1:

| Position         | Age | Sex | Organ  | Pathology diagnosis                                                                            | TNM    | Grade | Stage |
|------------------|-----|-----|--------|------------------------------------------------------------------------------------------------|--------|-------|-------|
| A1 <sup>a</sup>  | 61  | F   | Tongue | Squamous cell carcinoma of palate                                                              | T1N0M0 | 1     | I     |
| A2 <sup>a</sup>  | 61  | M   | Tongue | Squamous cell carcinoma of lower lip                                                           | T1N0M0 | 1     | I     |
| A3 <sup>a</sup>  | 77  | M   | Tongue | Squamous cell carcinoma of lower lip                                                           | T1N0M0 | 1     | I     |
| A4 <sup>a</sup>  | 75  | F   | Tongue | Squamous cell carcinoma of upper jaw (chronic inflammation of fibrous tissue and blood vessel) | T1N0M0 | -     | I     |
| A5 <sup>a</sup>  | 55  | M   | Tongue | Squamous cell carcinoma of tongue                                                              | T1N0M0 | 1     | I     |
| A6 <sup>a</sup>  | 67  | M   | Tongue | Squamous cell carcinoma of right palate                                                        | T2N0M0 | 1     | II    |
| A7 <sup>a</sup>  | 67  | M   | Larynx | Squamous cell carcinoma of larynx                                                              | T2N0M0 | 1     | II    |
| A8 <sup>a</sup>  | 70  | M   | Nose   | Squamous cell carcinoma of right maxillary sinus (fibrous tissue and blood vessel)             | T2N0M0 | -     | II    |
| A9 <sup>a</sup>  | 40  | M   | Larynx | Squamous cell carcinoma of larynx                                                              | T2N1M1 | 2     | IV    |
| A10 <sup>a</sup> | 55  | M   | Larynx | Squamous cell carcinoma of epiglottis                                                          | T4N0M0 | 2     | IV    |
| B1 <sup>a</sup>  | 57  | M   | Tongue | Squamous cell carcinoma of pharynx                                                             | T4N0M0 | 2     | IV    |
| B2 <sup>a</sup>  | 49  | M   | Tongue | Squamous cell carcinoma of left gingiva                                                        | T4N0M0 | 1     | IV    |
| B3 <sup>a</sup>  | 50  | M   | Tongue | Squamous cell carcinoma of root of tongue                                                      | T3N0M0 | 2     | III   |
| B4 <sup>a</sup>  | 54  | M   | Tongue | Squamous cell carcinoma of left upper jaw                                                      | T3N0M0 | 2     | III   |
| B5 <sup>a</sup>  | 72  | M   | Larynx | Squamous cell carcinoma of larynx                                                              | T2N0M0 | 2     | II    |
| B6 <sup>a</sup>  | 50  | M   | Tongue | Squamous cell carcinoma of tongue (sublingual gland tissue)                                    | T2N0M0 | -     | II    |
| B7 <sup>a</sup>  | 74  | M   | Nose   | Squamous cell carcinoma of nasal root                                                          | T2N0M0 | 2     | II    |
| B8 <sup>a</sup>  | 49  | M   | Larynx | Squamous cell carcinoma of larynx                                                              | T4N1M0 | 2     | IV    |
| B9 <sup>a</sup>  | 50  | M   | Larynx | Squamous cell carcinoma of larynx                                                              | T2N1M0 | 2     | III   |
| B10 <sup>a</sup> | 90  | M   | Tongue | Squamous cell carcinoma of cheek                                                               | T2N0M0 | 2     | II    |
| C1 <sup>a</sup>  | 67  | M   | Larynx | Squamous cell carcinoma of larynx                                                              | T3N1M0 | 2     | III   |
| C2 <sup>a</sup>  | 56  | M   | Larynx | Squamous cell carcinoma of epiglottis                                                          | T4N0M0 | 2     | IV    |
| C3 <sup>a</sup>  | 66  | M   | Larynx | Squamous cell carcinoma of left laryngeal pharynx (sparse)                                     | T3N2M0 | 2     | IV    |
| C4 <sup>a</sup>  | 58  | M   | Larynx | Squamous cell carcinoma of larynx                                                              | T3N1M1 | 2     | IV    |
| C5 <sup>a</sup>  | 60  | M   | Tongue | Squamous cell carcinoma of tongue                                                              | T2N0M0 | 3     | II    |
| C6 <sup>a</sup>  | 67  | M   | Larynx | Squamous cell carcinoma of sinus piriformis                                                    | T2N0M0 | 3     | II    |
| C7 <sup>a</sup>  | 56  | F   | Nose   | Squamous cell carcinoma of nasopharynx                                                         | T2N0M0 | 3     | II    |
| C8 <sup>a</sup>  | 48  | M   | Tongue | Squamous cell carcinoma of left submaxilla                                                     | T2N0M0 | 1     | II    |
| C9 <sup>a</sup>  | 56  | M   | Larynx | Squamous cell carcinoma of laryngeal pharynx                                                   | T2N0M0 | 2     | II    |
| C10 <sup>a</sup> | 43  | M   | Tongue | Squamous cell carcinoma of right submaxilla                                                    | T2N0M0 | 2     | II    |
| D1 <sup>a</sup>  | 70  | M   | Tongue | Squamous cell carcinoma of gingiva of right submaxilla                                         | T2N0M0 | 2     | II    |
| D2 <sup>a</sup>  | 61  | F   | Tongue | Squamous cell carcinoma of left submaxilla                                                     | T2N0M0 | 2     | II    |
| D3 <sup>a</sup>  | 56  | F   | Tongue | Squamous cell carcinoma of mouth floor                                                         | T2N0M0 | 2     | II    |
| D4 <sup>a</sup>  | 55  | M   | Larynx | Squamous cell carcinoma of larynx                                                              | T3N1M0 | 2     | III   |
| D5 <sup>a</sup>  | 50  | M   | Larynx | Squamous cell carcinoma of larynx                                                              | T3N1M0 | 2     | III   |
| D6 <sup>a</sup>  | 49  | M   | Larynx | Squamous cell carcinoma of larynx                                                              | T2N1M0 | 3     | III   |
| D7 <sup>a</sup>  | 71  | M   | Larynx | Squamous cell carcinoma of epiglottis                                                          | T3N1M0 | 2     | III   |
| D8 <sup>a</sup>  | 50  | F   | Larynx | Squamous cell carcinoma of laryngeal pharynx                                                   | T2N1M0 | 2     | III   |
| D9 <sup>a</sup>  | 58  | M   | Larynx | Squamous cell carcinoma of sinus piriformis                                                    | T3N0M0 | 2     | III   |
| D10 <sup>a</sup> | 71  | M   | Larynx | Squamous cell carcinoma of laryngeal pharynx                                                   | T2N1M0 | 2     | III   |

|                  |    |   |        |                                                            |        |   |     |
|------------------|----|---|--------|------------------------------------------------------------|--------|---|-----|
| E1 <sup>a</sup>  | 61 | M | Larynx | Squamous cell carcinoma of epiglottis                      | T2N1M0 | 2 | III |
| E2 <sup>a</sup>  | 44 | M | Nose   | Squamous cell carcinoma of laryngeal pharynx               | T2N1M0 | 2 | III |
| E3 <sup>a</sup>  | 61 | M | Larynx | Squamous cell carcinoma of larynx                          | T3N0M0 | 2 | III |
| E4 <sup>a</sup>  | 45 | M | Tongue | Squamous cell carcinoma of right cheek                     | T2N0M0 | 3 | II  |
| E5 <sup>a</sup>  | 47 | M | Larynx | Squamous cell carcinoma of larynx                          | T2N0M0 | 2 | II  |
| E6 <sup>a</sup>  | 63 | M | Larynx | Squamous cell carcinoma of epiglottis                      | T3N1M0 | 2 | III |
| E7 <sup>a</sup>  | 61 | M | Larynx | Squamous cell carcinoma of epiglottis                      | T2N0M0 | 3 | II  |
| E8 <sup>a</sup>  | 75 | M | Tongue | Squamous cell carcinoma of maxillary sinus                 | T4N0M0 | 3 | IV  |
| E9 <sup>a</sup>  | 50 | M | Nose   | Squamous cell carcinoma of sinus piriformis                | T2N0M0 | 3 | II  |
| E10 <sup>a</sup> | 64 | M | Larynx | Squamous cell carcinoma of larynx                          | T2N0M0 | 3 | II  |
| F1 <sup>a</sup>  | 38 | F | Tongue | Squamous cell carcinoma of lower lip                       | T2N0M0 | 3 | II  |
| F2 <sup>a</sup>  | 56 | F | Tongue | Squamous cell carcinoma of cheek                           | T3N0M0 | 3 | III |
| F3 <sup>a</sup>  | 42 | F | Nose   | Squamous cell carcinoma of nasal sinus                     | T3N0M0 | 3 | III |
| F4 <sup>a</sup>  | 47 | M | Larynx | Squamous cell carcinoma of larynx (mixed gland tissue)     | T2N1M0 | - | III |
| F5 <sup>a</sup>  | 51 | M | Larynx | Squamous cell carcinoma of larynx (sparse)                 | T2N1M0 | 2 | III |
| F6 <sup>a</sup>  | 58 | M | Larynx | Squamous cell carcinoma of sinus piriformis with necrosis  | T2N2M0 | 3 | IV  |
| F7 <sup>a</sup>  | 74 | M | Larynx | Squamous cell carcinoma of laryngeal pharynx with necrosis | T4N0M0 | 3 | IV  |
| F8 <sup>a</sup>  | 48 | M | Larynx | Squamous cell carcinoma of laryngeal pharynx               | T4N0M0 | 2 | IV  |
| F9 <sup>a</sup>  | 65 | M | Larynx | Squamous cell carcinoma of larynx                          | T3N2M0 | 3 | IV  |
| F10 <sup>a</sup> | 75 | M | Nose   | Squamous cell carcinoma of nasal sinus                     | T4N0M0 | 3 | IV  |
| G1 <sup>a</sup>  | 32 | F | Tongue | Carcinoma sarcomatodes of maxillary sinus                  | T2N0M0 | - | II  |
| G2 <sup>b</sup>  | 40 | F | Tongue | Metastatic mucoepidermoid carcinoma of neck                | -      | 3 | -   |
| G3 <sup>b</sup>  | 67 | M | Tongue | Metastatic mucoepidermoid carcinoma of base of tongue      | -      | 3 | -   |
| G4 <sup>b</sup>  | 55 | M | Tongue | Metastatic squamous cell carcinoma of left upper gingiva   | -      | 2 | -   |
| G5 <sup>b</sup>  | 47 | M | Tongue | Metastatic squamous cell carcinoma of oral cavity          | -      | 1 | -   |
| G6 <sup>b</sup>  | 49 | M | Tongue | Metastatic squamous cell carcinoma of hypoglottis          | -      | 2 | -   |
| G7 <sup>b</sup>  | 53 | M | Tongue | Metastatic squamous cell carcinoma of laryngeal pharynx    | -      | 3 | -   |
| G8 <sup>b</sup>  | 43 | M | Tongue | Metastatic acinic cell carcinoma of neck                   | -      | 3 | -   |
| G9 <sup>b</sup>  | 52 | F | Tongue | Metastatic acinic cell carcinoma of neck                   | -      | 1 | -   |
| G10 <sup>d</sup> | 38 | M | Tongue | Cancer adjacent normal tongue tissue                       | -      | - | -   |
| H1 <sup>c</sup>  | 28 | M | Tongue | Normal tongue tissue                                       | -      | - | -   |
| H2 <sup>c</sup>  | 27 | F | Tongue | Normal tongue tissue                                       | -      | - | -   |
| H3 <sup>c</sup>  | 48 | M | Tongue | Normal tongue tissue                                       | -      | - | -   |
| H4 <sup>d</sup>  | 42 | F | Tongue | Cancer adjacent normal tongue tissue                       | -      | - | -   |
| H5 <sup>c</sup>  | 15 | F | Tongue | Normal tongue tissue                                       | -      | - | -   |
| H6 <sup>c</sup>  | 19 | F | Tongue | Normal tongue tissue                                       | -      | - | -   |
| H7 <sup>c</sup>  | 35 | M | Tongue | Normal tongue tissue                                       | -      | - | -   |
| H8 <sup>c</sup>  | 18 | F | Tongue | Normal tongue tissue                                       | -      | - | -   |
| H9 <sup>c</sup>  | 19 | F | Tongue | Normal tongue tissue                                       | -      | - | -   |
| H10 <sup>c</sup> | 28 | M | Tongue | Normal pharynx tissue                                      | -      | - | -   |

a: malignant tissues, b: metastatic tissues, c: Normal tissues, d: Normal adjacent tissue

Table 2:

| Position         | Age | Sex | Organ                | Pathology diagnosis                                         | TNM    | Grade | Stage |
|------------------|-----|-----|----------------------|-------------------------------------------------------------|--------|-------|-------|
| A1 <sup>a</sup>  | 40  | M   | Gingiva              | Squamous cell carcinoma                                     | T4N0M0 | 1     | IV    |
| A2 <sup>a</sup>  | 47  | F   | Tongue               | Squamous cell carcinoma                                     | T1N0M0 | 1     | I     |
| A3 <sup>a</sup>  | 81  | M   | Lip                  | Squamous cell carcinoma                                     | T2N0M0 | 1     | II    |
| A4 <sup>a</sup>  | 57  | M   | Tongue               | Squamous cell carcinoma                                     | T1N0M0 | 1     | I     |
| A5 <sup>a</sup>  | 52  | F   | Lip                  | Squamous cell carcinoma                                     | T1N0M0 | 2     | I     |
| A6 <sup>a</sup>  | 53  | M   | Cheek                | Squamous cell carcinoma                                     | T2N0M0 | 1     | II    |
| A7 <sup>a</sup>  | 62  | F   | Cheek                | Squamous cell carcinoma                                     | T1N0M0 | 1     | I     |
| A8 <sup>a</sup>  | 48  | M   | Base of tongue       | Squamous cell carcinoma                                     | T2N0M0 | -     | II    |
| A9 <sup>a</sup>  | 68  | M   | Right palate         | Squamous cell carcinoma                                     | T2N0M0 | 1     | II    |
| A10 <sup>a</sup> | 56  | F   | Cheek                | Squamous cell carcinoma                                     | T2N0M0 | 1     | II    |
| B1 <sup>a</sup>  | 79  | M   | Cheek                | Squamous cell carcinoma                                     | T2N0M0 | 1     | II    |
| B2 <sup>a</sup>  | 60  | M   | Gingiva              | Squamous cell carcinoma                                     | T1N0M0 | 1     | I     |
| B3 <sup>a</sup>  | 55  | M   | Cheek                | Squamous cell carcinoma                                     | T1N0M0 | 1     | I     |
| B4 <sup>a</sup>  | 66  | M   | Tongue               | Squamous cell carcinoma                                     | T1N0M0 | 1     | I     |
| B5 <sup>a</sup>  | 46  | F   | Tongue               | Squamous cell carcinoma                                     | T1N0M1 | 1     | IV    |
| B6 <sup>a</sup>  | 39  | F   | Tongue               | Squamous cell carcinoma                                     | T1N0M0 | 1     | I     |
| B7 <sup>a</sup>  | 78  | M   | Tongue               | Squamous cell carcinoma                                     | T2N0M0 | 1     | II    |
| B8 <sup>a</sup>  | 78  | F   | Lip                  | Squamous cell carcinoma                                     | T1N0M1 | 1     | IV    |
| B9 <sup>a</sup>  | 54  | F   | Lip                  | Squamous cell carcinoma                                     | T1N0M1 | 1     | IV    |
| B10 <sup>a</sup> | 75  | F   | Lip                  | Squamous cell carcinoma                                     | T1N0M1 | 1     | IV    |
| C1 <sup>a</sup>  | 60  | M   | Tongue               | Squamous cell carcinoma                                     | T1N0M0 | 1     | I     |
| C2 <sup>a</sup>  | 73  | M   | Lip                  | Squamous cell carcinoma                                     | T1N0M0 | 1     | I     |
| C3 <sup>a</sup>  | 60  | M   | Gingiva              | Squamous cell carcinoma                                     | T1N0M0 | 2     | I     |
| C4 <sup>a</sup>  | 78  | M   | Lip                  | Squamous cell carcinoma                                     | T1N0M0 | 2     | I     |
| C5 <sup>a</sup>  | 55  | M   | Gingiva              | Squamous cell carcinoma                                     | T1N0M0 | 2--3  | I     |
| C6 <sup>a</sup>  | 47  | M   | Lower mandible       | Squamous cell carcinoma                                     | T2N0M0 | 3     | II    |
| C7 <sup>a</sup>  | 41  | M   | Dental alveoli       | Squamous cell carcinoma                                     | T1N0M0 | 3     | I     |
| C8 <sup>a</sup>  | 60  | M   | Tongue               | Squamous cell carcinoma                                     | T2N0M0 | 3     | II    |
| C9 <sup>a</sup>  | 40  | F   | Palate               | Adenoid cystic carcinoma                                    | T1N0M0 | -     | I     |
| C10 <sup>a</sup> | 45  | M   | Left lower mandible  | Adenoid cystic carcinoma (sparse)                           | T1N0M0 | -     | I     |
| D1 <sup>a</sup>  | 64  | M   | Palate               | Adenoid cystic carcinoma                                    | T2N0M0 | -     | II    |
| D2 <sup>a</sup>  | 66  | M   | Parotid gland        | Acinic cell carcinoma                                       | T2N0M0 | -     | II    |
| D3 <sup>a</sup>  | 71  | M   | Mouth floor          | Mucoepidermoid carcinoma                                    | T1N0M0 | 1     | I     |
| D4 <sup>a</sup>  | 57  | M   | Palate               | Mucoepidermoid carcinoma                                    | T2N0M0 | 1     | II    |
| D5 <sup>a</sup>  | 50  | F   | Cheek                | Mucoepidermoid carcinoma                                    | T2N0M0 | 1     | II    |
| D6 <sup>a</sup>  | 57  | M   | Upper lip            | Mucoepidermoid carcinoma (skeletal muscle and blood vessel) | T1N0M0 | -     | I     |
| D7 <sup>a</sup>  | 48  | F   | Right lower mandible | Mucoepidermoid carcinoma                                    | T1N0M0 | 2     | I     |
| D8 <sup>a</sup>  | 55  | M   | Gingiva              | Mucoepidermoid carcinoma                                    | T1N0M0 | 3     | I     |

|                  |    |   |                      |                                                                                  |        |   |     |
|------------------|----|---|----------------------|----------------------------------------------------------------------------------|--------|---|-----|
| D9 <sup>a</sup>  | 60 | M | Right lower mandible | Mucoepidermoid carcinoma                                                         | T3N0M0 | 3 | III |
| D10 <sup>a</sup> | 50 | M | Root of tongue       | Mucoepidermoid carcinoma (sparse)                                                | T1N0M0 | - | I   |
| E1 <sup>a</sup>  | 79 | F | Lip                  | Basal cell carcinoma (sparse)                                                    | T2N0M0 | - | II  |
| E2 <sup>a</sup>  | 48 | F | Lip                  | Basal cell carcinoma                                                             | T2N0M0 | - | II  |
| E3 <sup>b</sup>  | 70 | F | Lymph node           | Metastatic squamous cell carcinoma of neck from cheek                            | -      | 2 | -   |
| E4 <sup>b</sup>  | 79 | M | Lymph node           | Metastatic squamous cell carcinoma of neck from tongue                           | -      | 1 | -   |
| E5 <sup>b</sup>  | 59 | F | Lymph node           | Metastatic squamous cell carcinoma of neck from mandible                         | -      | 2 | -   |
| E6 <sup>b</sup>  | 40 | F | Lymph node           | Metastatic mucoepidermoid carcinoma of neck from mandible                        | -      | 3 | -   |
| E7 <sup>c</sup>  | 11 | M | Mandible             | Adamantinoma                                                                     | -      | - | -   |
| E8 <sup>c</sup>  | 28 | M | Left mandible        | Adamantinoma                                                                     | -      | - | -   |
| E9 <sup>c</sup>  | 51 | M | Right mandible       | Adamantinoma                                                                     | -      | - | -   |
| E10 <sup>c</sup> | 64 | M | Mandible             | Adamantinoma (fibrous tissue and blood vessel)                                   | -      | - | -   |
| F1 <sup>e</sup>  | 37 | F | Mandible             | Adamantinoma                                                                     | -      | - | -   |
| F2 <sup>e</sup>  | 40 | M | Lower mandible       | Adamantinoma                                                                     | -      | - | -   |
| F3 <sup>e</sup>  | 47 | F | Mandible             | Adamantinoma                                                                     | -      | - | -   |
| F4 <sup>e</sup>  | 70 | F | Right jaw bones      | Adamantinoma                                                                     | -      | - | -   |
| F5 <sup>f</sup>  | 67 | M | Lip                  | Hyperplasia of squamous epithelium                                               | -      | - | -   |
| F6 <sup>f</sup>  | 40 | M | Lip                  | Mild atypical hyperplasia of squamous epithelium                                 | -      | - | -   |
| F7 <sup>f</sup>  | 82 | M | Lip                  | Hyperplasia of squamous epithelium                                               | -      | - | -   |
| F8 <sup>f</sup>  | 46 | M | Tongue               | Hyperplasia of squamous epithelium (skeletal muscle and blood vessel)            | -      | - | -   |
| F9 <sup>f</sup>  | 60 | F | Tongue               | Hyperplasia of squamous epithelium                                               | -      | - | -   |
| F10 <sup>f</sup> | 3  | F | Tongue               | Hyperplasia of squamous epithelium                                               | -      | - | -   |
| G1 <sup>g</sup>  | 68 | M | Parotid gland        | Cancer adjacent tissue (with squamous cell carcinoma sparse)                     | -      | - | -   |
| G2 <sup>g</sup>  | 53 | F | Tongue               | Cancer adjacent tissue                                                           | -      | - | -   |
| G3 <sup>g</sup>  | 53 | M | Tongue               | Cancer adjacent tissue (hyperplasia of squamous epithelium)                      | -      | - | -   |
| G4 <sup>g</sup>  | 70 | M | Parotid gland        | Cancer adjacent tissue (with mucoepidermoid carcinoma)                           | -      | 2 | -   |
| G5 <sup>g</sup>  | 63 | M | Lip                  | Cancer adjacent tissue (chronic inflammation of fibrous tissue and blood vessel) | -      | - | -   |
| G6 <sup>h</sup>  | 43 | M | Sub maxillary gland  | Chronic submaxillaritis                                                          | -      | - | -   |
| G7 <sup>h</sup>  | 23 | F | Parotid gland        | Chronic parotitis                                                                | -      | - | -   |
| G8 <sup>h</sup>  | 66 | F | Parotid gland        | Chronic parotitis                                                                | -      | - | -   |
| G9 <sup>h</sup>  | 40 | F | Right cheek          | Chronic inflammation of mucosa                                                   | -      | - | -   |

|                  |    |   |                |                                              |   |   |   |
|------------------|----|---|----------------|----------------------------------------------|---|---|---|
| G10 <sup>h</sup> | 75 | F | Lower lip      | Chronic inflammation of mucosa of No. 20     | - | - | - |
| H1 <sup>d</sup>  | 48 | F | Salivary gland | Cancer adjacent normal salivary gland tissue | - | - | - |
| H2 <sup>d</sup>  | 48 | F | Salivary gland | Cancer adjacent normal salivary gland tissue | - | - | - |
| H3 <sup>d</sup>  | 37 | M | Salivary gland | Cancer adjacent normal salivary gland tissue | - | - | - |
| H4 <sup>d</sup>  | 63 | M | Salivary gland | Cancer adjacent normal salivary gland tissue | - | - | - |
| H5 <sup>d</sup>  | 56 | M | Salivary gland | Cancer adjacent normal salivary gland tissue | - | - | - |
| H6 <sup>c</sup>  | 42 | F | Tongue         | Normal tongue tissue                         | - | - | - |
| H7 <sup>c</sup>  | 38 | F | Salivary gland | Normal salivary gland tissue                 | - | - | - |
| H8 <sup>c</sup>  | 48 | M | Tongue         | Normal tongue tissue                         | - | - | - |
| H9 <sup>c</sup>  | 50 | M | Salivary gland | Normal salivary gland tissue                 | - | - | - |
| H10 <sup>c</sup> | 22 | M | Salivary gland | Normal salivary gland tissue                 | - | - | - |

a: malignant tissues, b: metastatic tissues, c: Normal tissues, d: Normal adjacent tissue, e: benign tissues, f: hyperplastic tissues, g: cancer adjacent tissue, h: inflammation

Table 3:

| S. No | Clone          | Sequence                                                         |
|-------|----------------|------------------------------------------------------------------|
| 1     | TRCN0000372769 | CCGGCAATTCTCAGAGAAGACAAAGCTCGAGCTTTGT<br>CTTCTCTGAGAATTGTTTTTG   |
| 2     | TRCN0000378896 | CCGGGAGTGGTGAGCACCAACTACACTCGAGTG TAG<br>TTGGTGCTCACC ACTCTTTTTG |
| 3     | TRCN0000372827 | CCGGGGAGCTGACTTCGGA ACTAACTCGAGTTTAGT<br>TCCGAAGTCAGCTCCTTTTTG   |
| 4     | TRCN0000060288 | CCGGGCTGGGCAACATTAAGAGTTACTCGAGTAACTC<br>TTAATGTTGCC CAGCTTTTTG  |
| 5     | TRCN0000060289 | CCGGCCAGCATGCTATGGTGTTCTTCTCGAGAAGAAC<br>ACCATAGCATGCTGGTTTTTG   |
| 6     | SHC204         | CCGGCGTGATCTTCACCGACAAGATCTCGAGATCTTG<br>TCGGTGAAGATCTTTTT       |

Table 4:

| Gene      |   | Primers                                   | T <sub>m</sub> (°C) | Amplicon Size |
|-----------|---|-------------------------------------------|---------------------|---------------|
| NGAL      | F | 5' ATGCCCCTAGGTCTCCTGT 3'                 | 55 °C               | 597bp         |
|           | R | 5' T C A G C C G T C G A T A C A C T G 3' |                     |               |
| LKB1      | F | TCAAAATCTCCGACCTGGGC                      | 55 °C               | 570bp         |
|           | R | TGTGACTGGCCTCCTCTTCT                      |                     |               |
| AMPK      | F | CGGCAAAGTGAAGGTTGGCAA                     | 59 °C               | 227bp         |
|           | R | CAAATAGCTCTCCTCCTGAGAC                    |                     |               |
| P53       | F | CTGCCCTCAACAAGATGTTTTG                    | 55 °C               | 172bp         |
|           | R | CTATCTGAGCAGCGCTCATGG                     |                     |               |
| Redd-1    | F | CTGATGCCTAGCCAGTTGGT                      | 55 °C               | 233bp         |
|           | R | GAGCTAAACAGCCCCTGGAT                      |                     |               |
| Caspase-3 | F | ATGGAGAACACTGAAAACTCAGTGGATT              | 65 °C               | 782bp         |
|           | R | CCACCAACCAACCATTCTTTAGTG                  |                     |               |
| GAPDH     | F | AGG TCG GAG TCA ACG GAT TTG               | 60 °C               | 532bp         |
|           | R | GTG ATG GCA TGG ACT GTG GT                |                     |               |
