# Supplementary material for: NGAL is Downregulated in Oral Squamous Cell Carcinoma and Leads to Increased Survival, Proliferation, Migration, and Chemoresistance
Source: Preprints.org preprint supplement (doi:10.20944/preprints201805.0076.v1), 2018-05-03
Supplement: Supplementary file 3 [file supplementary]

Archive with 3 entries (3 files):
- Supplementary Figure legends.pdf
- Supplementary Figures.pptx
- Supplementary table.pdf
